# Supplementary material for: Combining Human Genetics of Multiple Sclerosis with Oxidative Stress Phenotype for Drug Repositioning
Source: MDPI journal article supplement (doi:10.3390/pharmaceutics13122064), 2021-12-02
Supplement: s1 [file s1]

# Supplementary Materials: Combining Human Genetics of Multiple Sclerosis with Oxidative Stress Phenotype for Drug Repositioning

Stefania Olla, Maristella Steri, Alessia Formato Michael B. Whalen, Silvia Corbisiero and Cristina Agres

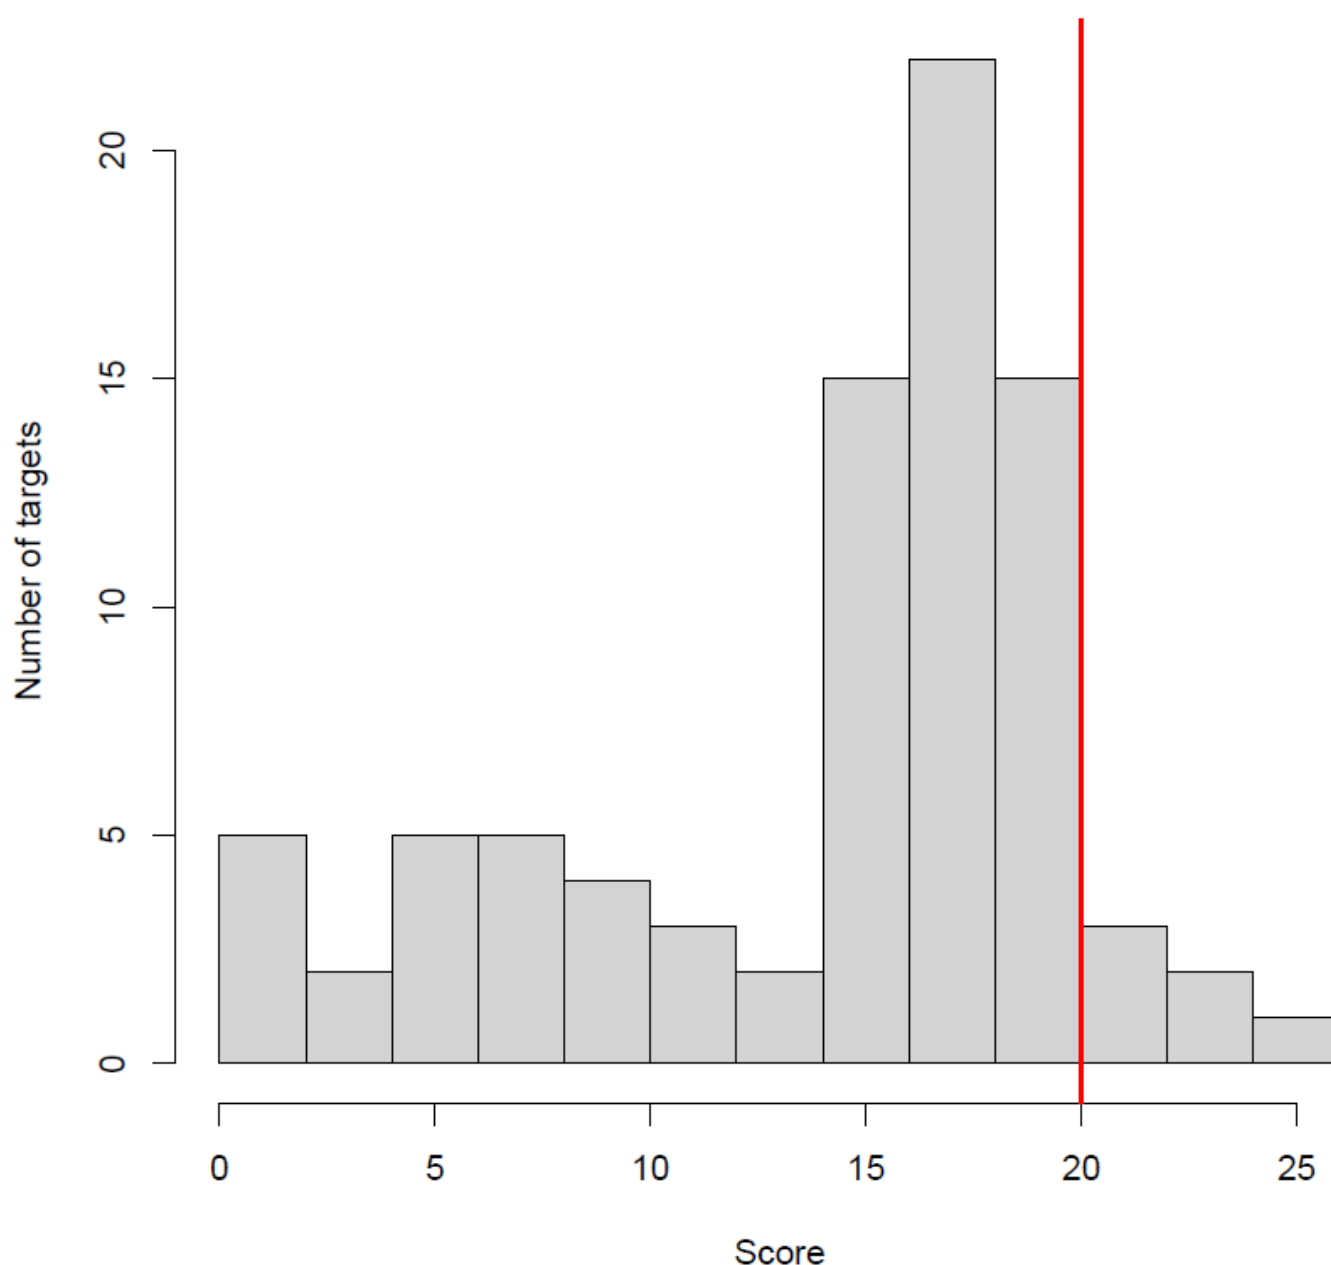

**Figure S1.** Prioritization score distribution
